# Supplementary material for: Review article: Fire emissions in the Brazilian Cerrado – dynamics, estimates, management, and their role in the global carbon budget
Source: Copernicus journal article supplement (doi:10.5194/nhess-25-3581-2025), 2025-09-23
Supplement: Supplementary file 1 [file nhess-25-3581-2025-supplement.pdf]

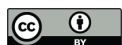

*Supplement of*

**Review article: Fire emissions in the Brazilian Cerrado – dynamics, estimates, management, and their role in the global carbon budget**

**Renata Moura da Veiga et al.**

*Correspondence to:* Renata Moura da Veiga ([rmvrenata@gmail.com](mailto:rmvrenata@gmail.com))

The copyright of individual parts of the supplement might differ from the article licence.

**Table S1. List of the 77 papers identified through the systematic review process and included in this literature review, with their classification for area of study, topic of research, subsection of Results to which the paper belongs, methodological techniques, study design, and institution of authors.**

| <b>Paper title</b>                                                                                                                                          | <b>Year of publication</b> | <b>Authors</b>         | <b>Area of study</b> | <b>Topics</b>         | <b>Result's subsection</b> | <b>Methodological techniques</b>    | <b>Study design</b> | <b>Institution of the first author</b> | <b>Brazilian institution of the first author within the Cerrado biome</b> | <b>Brazilian institution involved in International-led papers</b> | <b>International institution involved in Brazilian-led papers</b> |
|-------------------------------------------------------------------------------------------------------------------------------------------------------------|----------------------------|------------------------|----------------------|-----------------------|----------------------------|-------------------------------------|---------------------|----------------------------------------|---------------------------------------------------------------------------|-------------------------------------------------------------------|-------------------------------------------------------------------|
| Fire and smoke observed from the Earth Observing System MODIS instrument--products, validation, and operational use                                         | 2003                       | Kaufman et al.         | Global               | Parameters            | 3.2.1                      | NA - review                         | Review              | International                          |                                                                           | No                                                                |                                                                   |
| Carbon emissions from fires in tropical and subtropical ecosystems                                                                                          | 2003                       | Van der Werf et al.    | Tropical region      | Emissions             | 3.3                        | Model; Satellite                    | Empirical           | International                          |                                                                           | No                                                                |                                                                   |
| Remote measurement of energy and carbon flux from wildfires in Brazil                                                                                       | 2004                       | Riggan et al.          | Cerrado              | Emissions; Parameters | 3.2.1; 3.3                 | In situ observation                 | Empirical           | International                          |                                                                           | Yes                                                               |                                                                   |
| Global Wildland Fire Emission Model (GWEM): Evaluating the use of global area burnt satellite data                                                          | 2004                       | Hoelzemann et al.      | Global               | Emissions; Parameters | 3.2.1; 3.3                 | Model                               | Empirical           | International                          |                                                                           | No                                                                |                                                                   |
| A review of biomass burning emissions part II: intensive physical properties of biomass burning particles                                                   | 2005                       | Reid et al.            | Global               | Parameters            | 3.2.2                      | NA - review                         | Review              | International                          |                                                                           | No                                                                |                                                                   |
| A review of biomass burning emissions, part I: gaseous emissions of carbon monoxide, methane, volatile organic compounds, and nitrogen containing compounds | 2005                       | Koppman et al.         | Global               | Emissions; Parameters | 3.2.2; 3.3                 | NA - review                         | Review              | International                          |                                                                           | No                                                                |                                                                   |
| Biomass burning emissions: a review of models using remote-sensing data                                                                                     | 2005                       | Palacios-Orueta et al. | Global               | Emissions             | 3.3                        | NA - review                         | Review              | International                          |                                                                           | No                                                                |                                                                   |
| Monitoring the transport of biomass burning emissions in South America                                                                                      | 2005                       | Freitas et al.         | South America        | Emissions             | 3.3                        | Model; Satellite                    | Empirical           | National                               | No                                                                        |                                                                   | Yes                                                               |
| Productivity and carbon fluxes of tropical savannas                                                                                                         | 2006                       | Grace et al.           | Tropical region      | Emissions             | 3.3                        | NA - review                         | Review              | International                          |                                                                           | Yes                                                               |                                                                   |
| Global characterization of biomass-burning patterns using satellite measurements of fire radiative energy                                                   | 2008                       | Ichoku et al.          | Global               | Parameters            | 3.2.3                      | Satellite                           | Empirical           | International                          |                                                                           | No                                                                |                                                                   |
| Global wildland fire emissions from 1960 to 2000                                                                                                            | 2008                       | Schultz et al.         | Global               | Emissions; Parameters | 3.2.1; 3.3                 | Literature review; Model; Satellite | Empirical           | International                          |                                                                           | Yes                                                               |                                                                   |
| Biomass burning aerosol emissions from vegetation fires: particle number and mass emission factors and size distributions                                   | 2009                       | Janhall et al.         | Global               | Emissions; Parameters | 3.2.2; 3.3                 | Literature review                   | Empirical           | International                          |                                                                           | No                                                                |                                                                   |
| An approach to estimate global biomass burning emissions of                                                                                                 | 2009                       | Vermote et al.         | Global               | Emissions             | 3.3                        | Satellite                           | Empirical           | International                          |                                                                           | No                                                                |                                                                   |

|                                                                                                                                                           |      |                       |                 |                       |              |                  |           |               |     |    |     |
|-----------------------------------------------------------------------------------------------------------------------------------------------------------|------|-----------------------|-----------------|-----------------------|--------------|------------------|-----------|---------------|-----|----|-----|
| organic and black carbon from MODIS fire radiative power                                                                                                  |      |                       |                 |                       |              |                  |           |               |     |    |     |
| Estimating trace gas and aerosol emissions over South America: Relationship between fire radiative energy released and aerosol optical depth observations | 2009 | Pereira et al.        | South America   | Emissions             | 3.3          | Model; Satellite | Empirical | National      | No  |    | No  |
| Global fire emissions and the contribution of deforestation, savanna, forest, agricultural, and peat fires (1997–2009)                                    | 2010 | Van der Werf et al.   | Global          | Emissions             | 3.3          | Model            | Empirical | International |     | No |     |
| Nitrogen deposition in tropical forests from savanna and deforestation fires                                                                              | 2010 | Chen et al.           | Tropical region | Emissions             | 3.3          | Model            | Empirical | International |     | No |     |
| Daily and 3-hourly variability in global fire emissions and consequences for atmospheric model predictions of carbon monoxide                             | 2011 | Mu et al.             | Global          | Emissions             | 3.3          | Model; Satellite | Empirical | International |     | No |     |
| Greenhouse gas induced changes in the fire risk in Brazil in ECHAM5/MPI-OM coupled climate model                                                          | 2011 | Justino et al.        | Brazil          | Parameters            | 3.2.3        | Model            | Empirical | National      | No  |    | Yes |
| The use of fire in the Cerrado and Amazonian rainforests of Brazil: past and present                                                                      | 2011 | Pivello               | Brazil          | Fire management       | 3.4          | NA - review      | Review    | National      | No  |    | No  |
| Biomass burning emissions estimated with a global fire assimilation system based on observed fire radiative power                                         | 2012 | Kaiser et al.         | Global          | Emissions             | 3.3          | Model; Satellite | Empirical | International |     | No |     |
| Potential impacts of climate change on biogeochemical functioning of Cerrado ecosystems                                                                   | 2012 | Bustamante et al.     | Cerrado         | Emissions; Parameters | 3.2.3; 3.3   | NA - review      | Review    | National      | Yes |    | No  |
| Dynamic biomass burning emission factors and their impact on atmospheric CO mixing ratios                                                                 | 2013 | Leeuwen et al.        | Global          | Emissions; Parameters | 3.2.2; 3.3   | Model            | Empirical | International |     | No |     |
| Long-term trends and interannual variability of forest, savanna and agricultural fires in South America                                                   | 2013 | Chen et al.           | South America   | Emissions; Parameters | 3.2.1; 3.3   | Model; Satellite | Empirical | International |     | No |     |
| Global top-down smoke-aerosol emissions estimation using satellite fire radiative power measurements                                                      | 2014 | Ichoku & Ellison      | Global          | Emissions             | 3.3          | Satellite        | Empirical | International |     | No |     |
| Satellite observations indicate substantial spatiotemporal variability in biomass burning NOx emission factors for South America                          | 2014 | Castellanos et al.    | South America   | Parameters            | 3.2.2        | Satellite        | Empirical | International |     | No |     |
| Modelling fire frequency in a Cerrado savanna protected area                                                                                              | 2014 | Pereira Junior et al. | Cerrado         | Parameters            | 3.2.1; 3.2.3 | Model; Satellite | Empirical | National      | No  |    | Yes |

|                                                                                                                                    |      |                        |                 |                             |            |                                       |             |               |     |     |     |
|------------------------------------------------------------------------------------------------------------------------------------|------|------------------------|-----------------|-----------------------------|------------|---------------------------------------|-------------|---------------|-----|-----|-----|
| Characterising Brazilian biomass burning emissions using WRF-Chem with MOSAIC sectional aerosol                                    | 2015 | Archer-Nicholls et al. | Brazil          | Emissions                   | 3.3        | Model; Satellite                      | Empirical   | International |     | Yes |     |
| High-resolution mapping of biomass burning emissions in three tropical regions                                                     | 2015 | Shi et al.             | Tropical region | Emissions                   | 3.3        | Satellite                             | Empirical   | International |     | No  |     |
| An algorithm for burned area detection in the Brazilian Cerrado using 4 µm MODIS imagery                                           | 2015 | Libonati et al.        | Cerrado         | Parameters                  | 3.2.1      | Satellite                             | Empirical   | National      | No  |     | Yes |
| Community owned solutions for fire management in tropical ecosystems: case studies from Indigenous communities of South America    | 2016 | Mistry et al.          | South America   | Fire management             | 3.4        | NA - review                           | Review      | International |     | No  |     |
| Biomass burning fuel consumption dynamics in the tropics and subtropics assessed from satellite                                    | 2016 | Andela et al.          | Tropical region | Parameters                  | 3.2.3      | Satellite                             | Empirical   | International |     | No  |     |
| The need for a consistent fire policy for Cerrado conservation                                                                     | 2016 | Durigan and Ratter     | Cerrado         | Fire policy                 | 3.4        | NA - perspective                      | Perspective | National      | Yes |     | Yes |
| Assessment of fire emission inventories during the South American Biomass Burning Analysis (SAMBBA) experiment                     | 2016 | Pereira et al.         | South America   | Emissions                   | 3.3        | In situ observation; Model; Satellite | Empirical   | National      | No  |     | Yes |
| Global fire emissions estimates during 1997–2016                                                                                   | 2017 | Van der Werf et al.    | Global          | Emissions                   | 3.3        | Model                                 | Empirical   | International |     | No  |     |
| Drivers of fire occurrence in a mountainous Brazilian cerrado savanna: Tracking long-term fire regimes using remote sensing        | 2017 | Alvarado et al.        | Cerrado         | Parameters                  | 3.2.1      | Satellite                             | Empirical   | National      | No  |     | No  |
| Fuel load mapping in the Brazilian Cerrado in support of integrated fire management                                                | 2018 | Franke et al.          | Cerrado         | Fire management; Parameters | 3.2.1; 3.4 | Satellite                             | Empirical   | International |     | Yes |     |
| Near-field emission profiling of tropical forest and Cerrado fires in Brazil during SAMBBA 2012                                    | 2018 | Hodgson et al.         | Cerrado         | Emissions; Parameters       | 3.2.2; 3.3 | In situ observation                   | Empirical   | International |     | Yes |     |
| A fire model with distinct crop, pasture, and non-agricultural burning: use of new data and a model-fitting algorithm for FINAL. 1 | 2018 | Rabin et al.           | Global          | Emissions; Parameters       | 3.2.1; 3.3 | Model                                 | Empirical   | International |     | No  |     |
| Biomass burning and carbon monoxide patterns in Brazil during the extreme drought years of 2005, 2010, and 2015                    | 2018 | Ribeiro et al.         | Brazil          | Emissions; Parameters       | 3.2.3; 3.3 | Satellite                             | Empirical   | National      | No  |     | Yes |
| An evaluation of contemporary savanna fire regimes in the Canastra National Park, Brazil: Outcomes of fire suppression policies    | 2018 | Batista et al.         | Cerrado         | Fire Management; Parameters | 3.2.1; 3.4 | Satellite                             | Empirical   | National      | Yes |     | Yes |
| How can we advance the knowledge on the behavior and                                                                               | 2018 | Gomes et al.           | Cerrado         | Parameters                  | 3.2.3      | NA - review                           | Review      | National      | Yes |     | No  |

|                                                                                                                                                                                              |      |                 |                 |                       |            |                   |             |               |     |     |     |
|----------------------------------------------------------------------------------------------------------------------------------------------------------------------------------------------|------|-----------------|-----------------|-----------------------|------------|-------------------|-------------|---------------|-----|-----|-----|
| effects of fire in the Cerrado biome?                                                                                                                                                        |      |                 |                 |                       |            |                   |             |               |     |     |     |
| Trends and gaps of the scientific literature about the effects of fire on Brazilian Cerrado                                                                                                  | 2018 | Arruda et al.   | Cerrado         | Parameters            | 3.2.3      | NA - review       | Review      | National      | Yes |     | No  |
| Impacts of the 1.5 °C global warming target on future burned area in the Brazilian Cerrado                                                                                                   | 2019 | Silva et al.    | Cerrado         | Parameters            | 3.2.1      | Model; Satellite  | Empirical   | International |     | Yes |     |
| Emission of trace gases and aerosols from biomass burning – an updated assessment                                                                                                            | 2019 | Andreae         | Global          | Parameters            | 3.2.2      | Literature review | Empirical   | International |     | No  |     |
| Influence of Fire on the Carbon Cycle and Climate                                                                                                                                            | 2019 | Lasslop et al.  | Global          | Emissions             | 3.3        | NA - review       | Review      | International |     | No  |     |
| Representation of fire, land-use change and vegetation dynamics in the Joint UK Land Environment Simulator vn4. 9 (JULES)                                                                    | 2019 | Burton et al.   | Global          | Emissions; Parameters | 3.2.3; 3.3 | Model             | Empirical   | International |     | Yes |     |
| New perspectives in fire management in South American savannas: The importance of intercultural governance                                                                                   | 2019 | Mistry et al.   | South America   | Fire management       | 3.4        | NA - perspective  | Perspective | International |     | Yes |     |
| Characterization and Trends of Fine Particulate Matter (PM2.5) Fire Emissions in the Brazilian Cerrado during 2002–2017                                                                      | 2019 | Mataveli et al. | Cerrado         | Emissions             | 3.3        | Model; Satellite  | Empirical   | National      | No  |     | Yes |
| The legacy of colonial fire management policies on traditional livelihoods and ecological sustainability in savannas: Impacts, consequences, new directions                                  | 2019 | Moura et al.    | Global          | Fire management       | 3.4        | NA - review       | Review      | National      | Yes |     | Yes |
| Substantial increases in Eastern Amazon and Cerrado biomass burning-sourced tropospheric ozone                                                                                               | 2020 | Pope et al.     | Brazil          | Emissions             | 3.3        | Model; Satellite  | Empirical   | International |     | No  |     |
| Influence of Satellite Sensor Pixel Size and Overpass Time on Undercounting of Cerrado/Savannah Landscape-Scale Fire Radiative Power (FRP): An Assessment Using the MODIS Airborne Simulator | 2020 | Sperling et al. | Cerrado         | Parameters            | 3.2.3      | Satellite         | Empirical   | International |     | No  |     |
| Woody aboveground biomass mapping of the Brazilian savanna with a multi-sensor and machine learning approach                                                                                 | 2020 | Bispo et al.    | Cerrado         | Parameters            | 3.2.1      | Satellite         | Empirical   | International |     | Yes |     |
| Six global biomass burning emission datasets: intercomparison and application in one global aerosol model                                                                                    | 2020 | Pan et al.      | Global          | Emissions             | 3.3        | Model             | Empirical   | International |     | No  |     |
| A multi-year and high-resolution inventory of biomass burning emissions in tropical                                                                                                          | 2020 | Shi et al.      | Tropical region | Emissions             | 3.3        | Satellite         | Empirical   | International |     | No  |     |

|                                                                                                                                                                              |      |                        |               |                                        |                        |                          |             |               |     |     |     |
|------------------------------------------------------------------------------------------------------------------------------------------------------------------------------|------|------------------------|---------------|----------------------------------------|------------------------|--------------------------|-------------|---------------|-----|-----|-----|
| continents from 2001–2017 based on satellite observations                                                                                                                    |      |                        |               |                                        |                        |                          |             |               |     |     |     |
| Persistent fire foci in all biomes undermine the Paris Agreement in Brazil                                                                                                   | 2020 | da Silva Junior et al. | Brazil        | Emissions; Parameters                  | 3.2.1; 3.3             | Model; Satellite         | Empirical   | National      | No  |     | Yes |
| Effects and behaviour of experimental fires in grasslands, savannas, and forests of the Brazilian Cerrado                                                                    | 2020 | Gomes et al.           | Cerrado       | Emissions; Parameters                  | 3.2.2; 3.2.3; 3.3      | Literature review; Model | Empirical   | National      | Yes |     | No  |
| Responses of plant biomass in the Brazilian savanna to frequent fires                                                                                                        | 2020 | Gomes et al.           | Cerrado       | Emissions; Parameters                  | 3.2.1; 3.2.3; 3.3      | Literature review; Model | Empirical   | National      | Yes |     | No  |
| Zero-fire: Not possible nor desirable in the Cerrado of Brazil                                                                                                               | 2020 | Durigan                | Cerrado       | Fire policy                            | 3.4                    | NA - perspective         | Perspective | National      | Yes |     | No  |
| Anthropogenic climate change contribution to wildfire-prone weather conditions in the Cerrado and Arc of deforestation                                                       | 2021 | Li et al.              | Brazil        | Parameters                             | 3.2.1                  | Model; Satellite         | Empirical   | International |     | Yes |     |
| Intraseasonal variability of greenhouse gas emission factors from biomass burning in the Brazilian Cerrado                                                                   | 2021 | Vernooij et al.        | Cerrado       | Parameters                             | 3.2.2                  | In situ observation      | Empirical   | International |     | Yes |     |
| Putting fire on the map of Brazilian savanna ecoregions                                                                                                                      | 2021 | Silva et al.           | Cerrado       | Parameters                             | 3.2.1; 3.2.3           | Satellite                | Empirical   | International |     | Yes |     |
| South American fires and their impacts on ecosystems increase with continued emissions                                                                                       | 2021 | Burton et al.          | South America | Emissions; Parameters                  | 3.2.1; 3.3             | Model                    | Empirical   | International |     | Yes |     |
| Understanding Brazil's catastrophic fires: Causes, consequences and policy needed to prevent future tragedies                                                                | 2021 | Pivello et al.         | Brazil        | Fire policy                            | 3.4                    | NA - review              | Review      | National      | No  |     | No  |
| Multi-sensor, active fire-supervised, one-class burned area mapping in the brazilian savanna                                                                                 | 2021 | Pereira et al.         | Cerrado       | Parameters                             | 3.2.1                  | Satellite                | Empirical   | National      | No  |     | Yes |
| Prescribed burning reduces large, high-intensity wildfires and emissions in the Brazilian savanna                                                                            | 2021 | Santos et al.          | Cerrado       | Emissions; Fire Management; Parameters | 3.2.1; 3.2.3; 3.3; 3.4 | Satellite                | Empirical   | National      | No  |     | Yes |
| The Brazilian Cerrado is becoming hotter and drier                                                                                                                           | 2021 | Hofmann et al.         | Cerrado       | Parameters                             | 3.2.3                  | Model; Satellite         | Empirical   | National      | No  |     | No  |
| Modeling fuel loads dynamics and fire spread probability in the Brazilian Cerrado                                                                                            | 2021 | Oliveira et al.        | Cerrado       | Emissions; Parameters                  | 3.2.1; 3.3             | Model; Satellite         | Empirical   | National      | Yes |     | No  |
| Fire Management and Carbon Programs: A Systematic Literature Review and Case Study Analysis                                                                                  | 2022 | da Veiga & Nikolakis   | Global        | Emissions; Fire Management             | 3.3; 3.4               | NA - review              | Review      | International |     | No  |     |
| Improving the south America wildfires smoke estimates: Integration of polar-orbiting and geostationary satellite fire products in the Brazilian biomass burning emission ... | 2022 | Pereira et al.         | South America | Emissions                              | 3.3                    | Model; Satellite         | Empirical   | National      | No  |     | No  |

|                                                                                                                                                |      |                 |         |                                        |                 |                                                          |           |               |     |     |     |
|------------------------------------------------------------------------------------------------------------------------------------------------|------|-----------------|---------|----------------------------------------|-----------------|----------------------------------------------------------|-----------|---------------|-----|-----|-----|
| Multi-decadal trends and variability in burned area from the fifth version of the Global Fire Emissions Database (GFED5)                       | 2023 | Chen et al.     | Global  | Parameters                             | 3.2.1           | Model; Satellite                                         | Empirical | International |     | No  |     |
| Dynamic savanna burning emission factors based on satellite data using a machine learning approach                                             | 2023 | Vernooij et al. | Global  | Parameters                             | 3.2.2           | In situ observation; Literature review; Model; Satellite | Empirical | International |     | Yes |     |
| Updated Land Use and Land Cover Information Improves Biomass Burning Emission Estimates                                                        | 2023 | Mataveli et al. | Brazil  | Emissions                              | 3.3             | Model; Satellite                                         | Empirical | National      | No  |     | Yes |
| A near real-time web-system for predicting fire spread across the Cerrado biome                                                                | 2023 | Oliveira et al. | Cerrado | Parameters                             | 3.2.3           | Model; Satellite                                         | Empirical | National      | Yes |     | No  |
| Prescribed burning and integrated fire management in the Brazilian Cerrado: demonstrated impacts and scale-up potential for emission abatement | 2024 | Franke et al.   | Cerrado | Emissions; Fire Management; Parameters | 3.2.3; 3.3; 3.4 | In situ observation; Satellite                           | Empirical | International |     | Yes |     |
| Global burned area increasingly explained by climate change                                                                                    | 2024 | Burton et al.   | Global  | Parameters                             | 3.2.1           | Model                                                    | Empirical | International |     | No  |     |
| Impacts of Fire Frequency on Net CO2 Emissions in the Cerrado Savanna Vegetation                                                               | 2024 | Gomes et al.    | Cerrado | Emissions                              | 3.3             | In situ observation; Literature review; Satellite        | Empirical | National      | Yes |     | No  |
| Assessing four decades of fire behavior dynamics in the Cerrado biome (1985 to 2022)                                                           | 2024 | Arruda et al.   | Cerrado | Parameters                             | 3.2.1; 3.2.3    | Satellite                                                | Empirical | National      | Yes |     | No  |
